# Supplementary material for: Ensemble of One-Class Classifiers for Personal Risk Detection Based on Wearable Sensor Data
Source: MDPI journal article supplement (doi:10.3390/s16101619), 2016-09-29

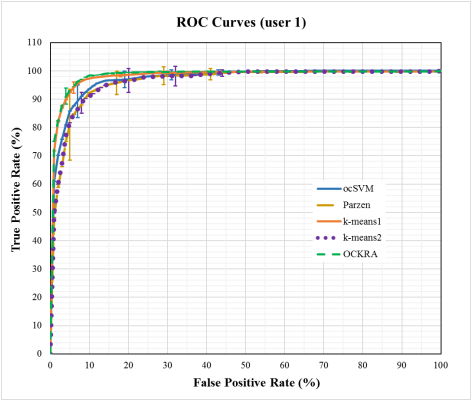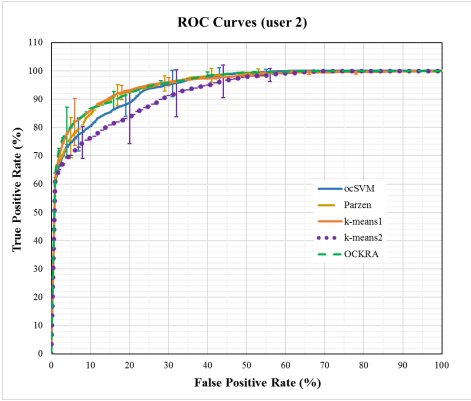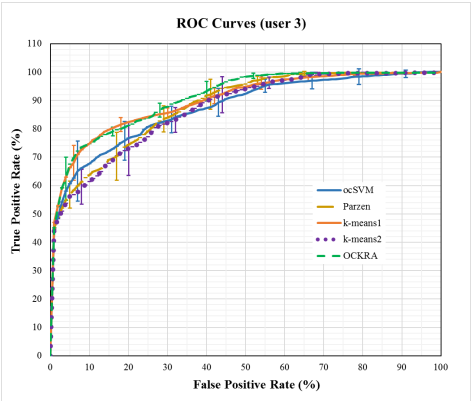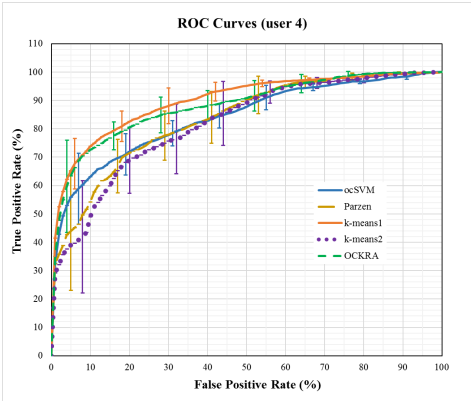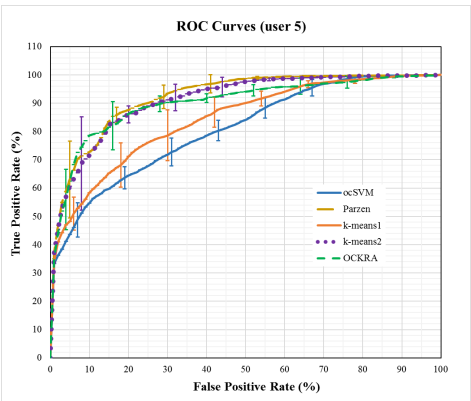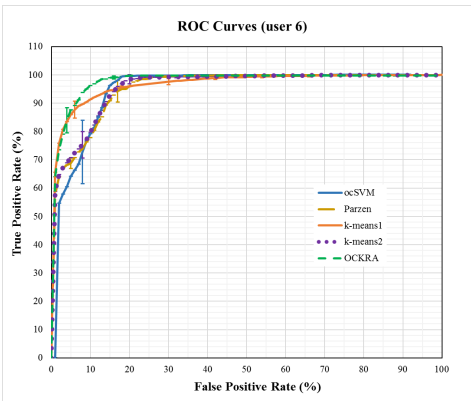

ROC Curves (user 7)

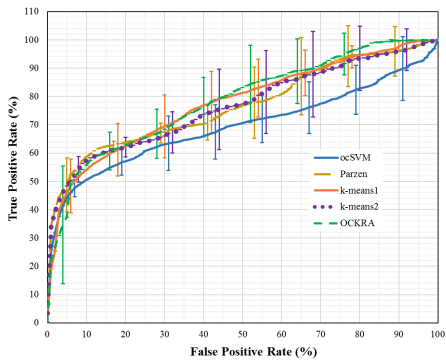

ROC Curves (user 8)

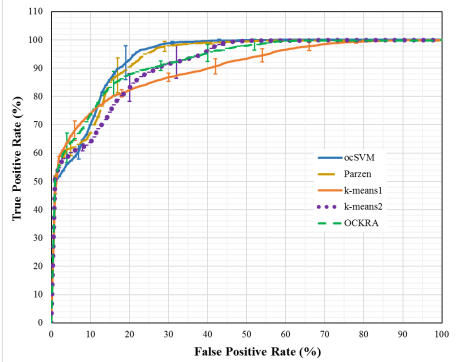

ROC Curves (user 9)

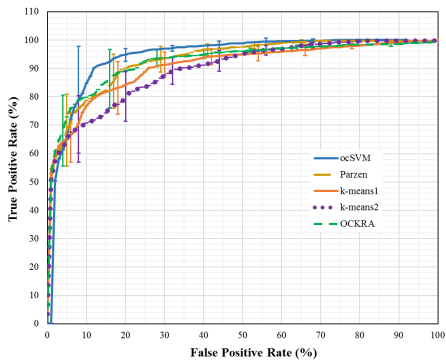

ROC Curves (user 10)

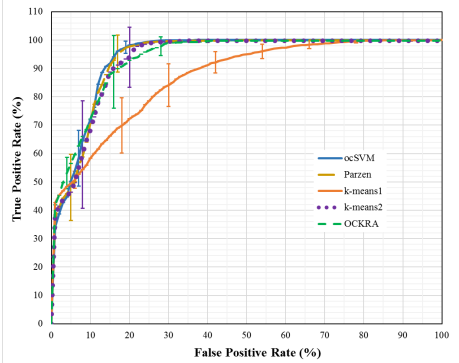

ROC Curves (user 11)

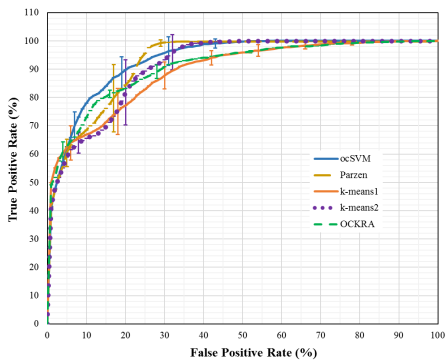

ROC Curves (user 12)

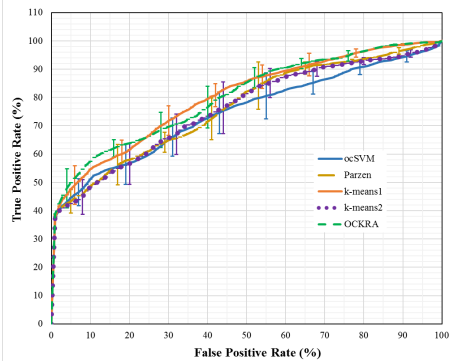

ROC Curves (user 13)

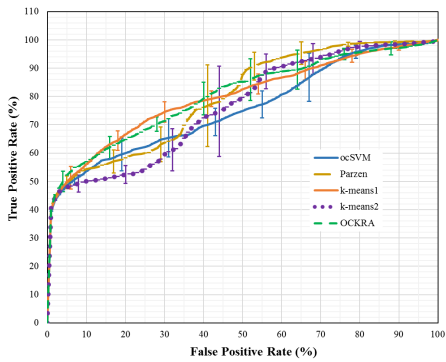

ROC Curves (user 14)

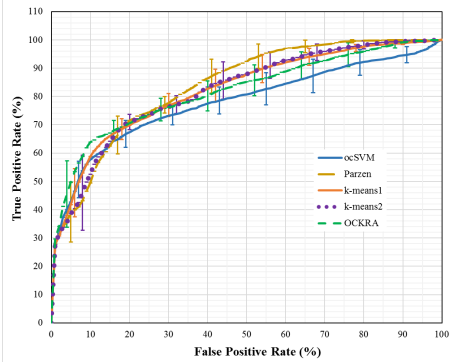

ROC Curves (user 15)

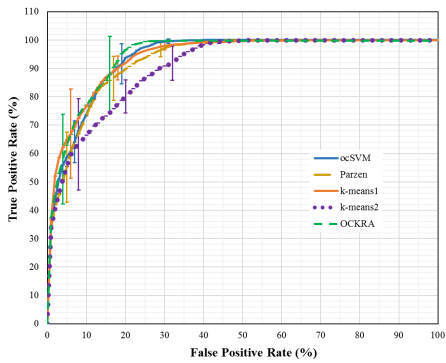

ROC Curves (user 16)

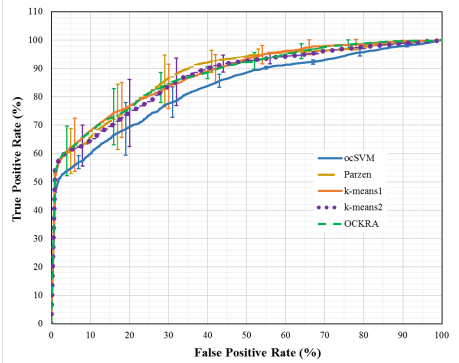

ROC Curves (user 17)

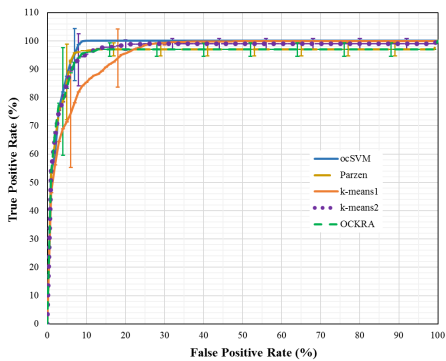

ROC Curves (user 18)

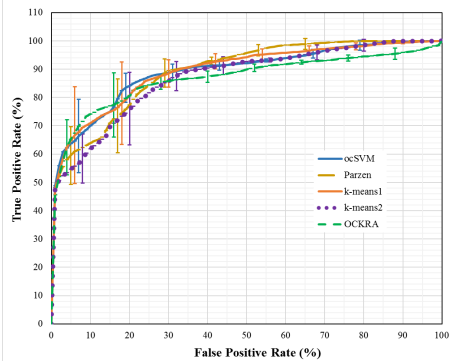

ROC Curves (user 19)

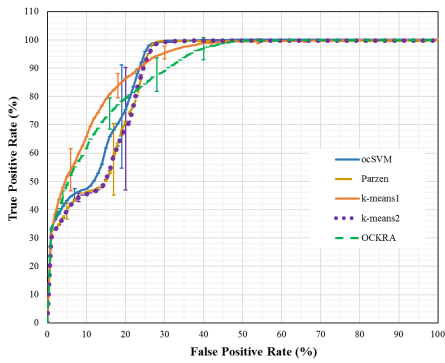

ROC Curves (user 20)

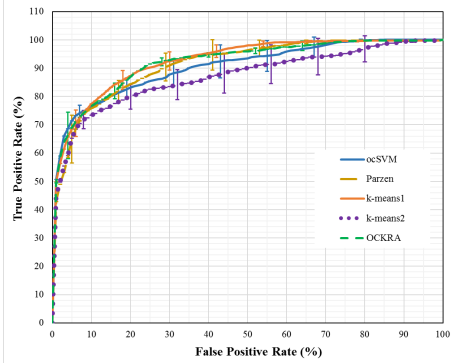

ROC Curves (user 21)

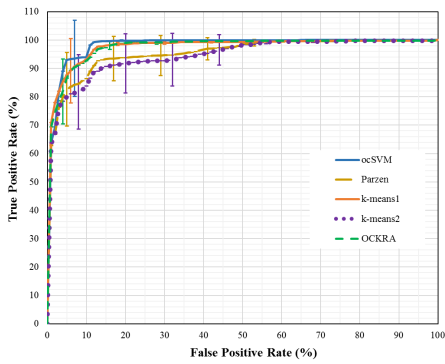

ROC Curves (user 22)

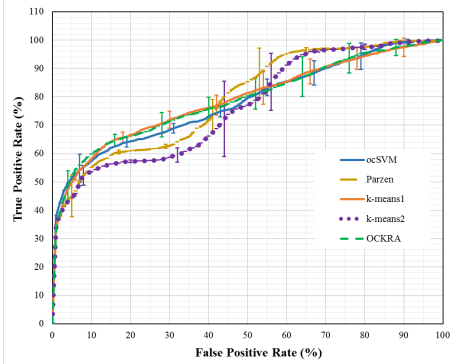

ROC Curves (user 23)

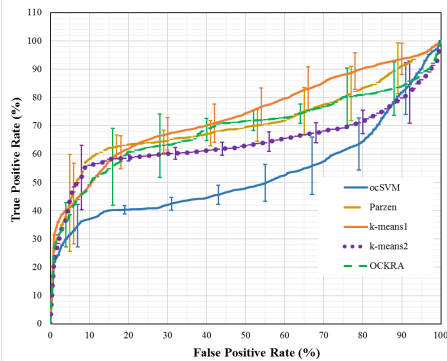

Supplement: s1 [file s1]
