# Supplementary figures and images for: Ensemble of One-Class Classifiers for Personal Risk Detection Based on Wearable Sensor Data
Source: MDPI journal article supplement (doi:10.3390/s16101619), 2016-09-29

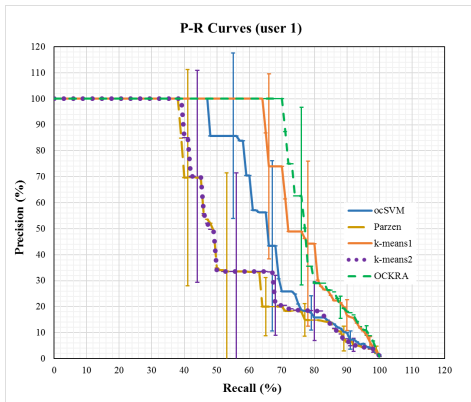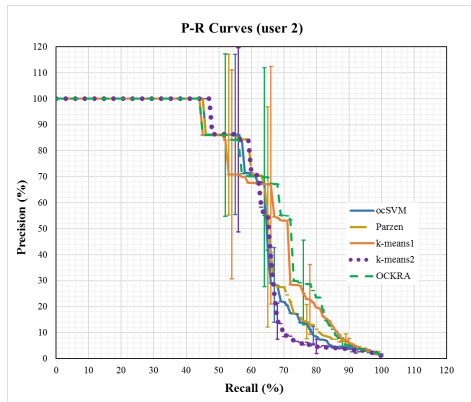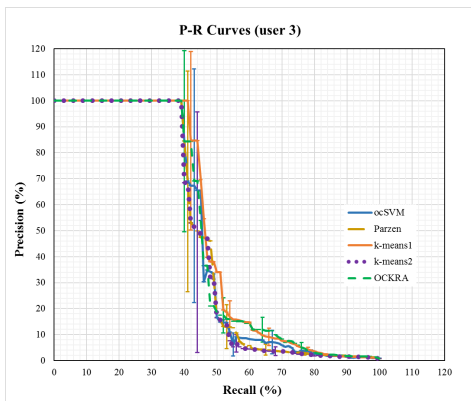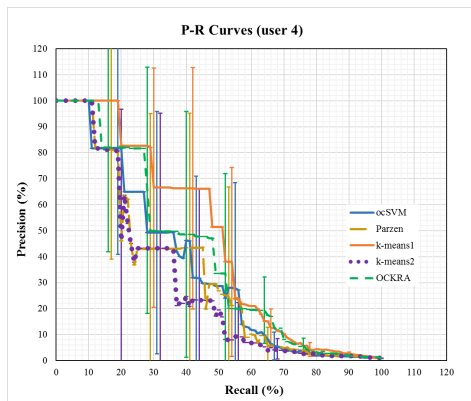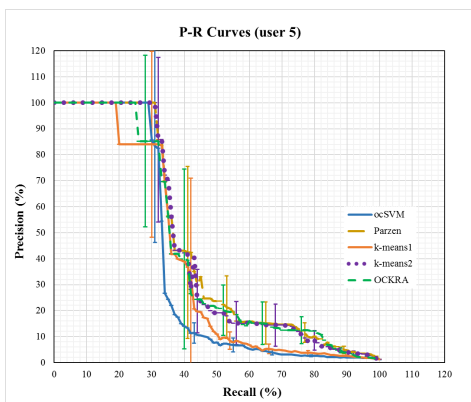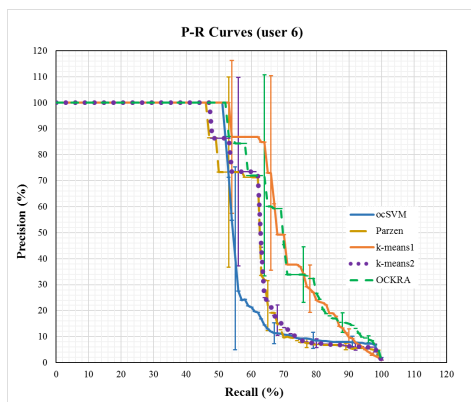

P-R Curves (user 7)

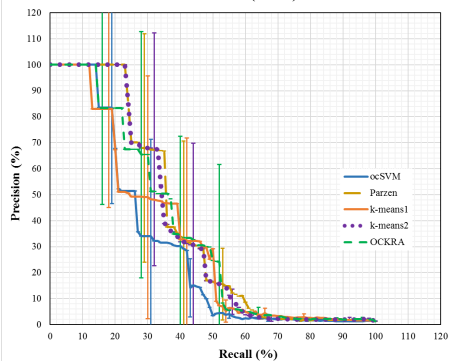

P-R Curves (user 8)

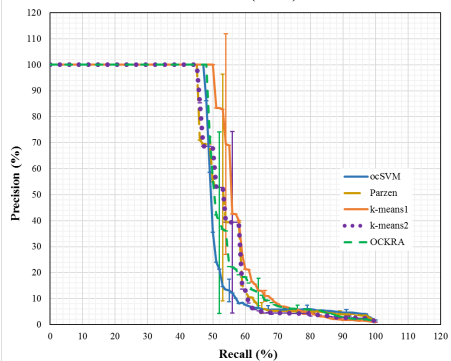

P-R Curves (user 9)

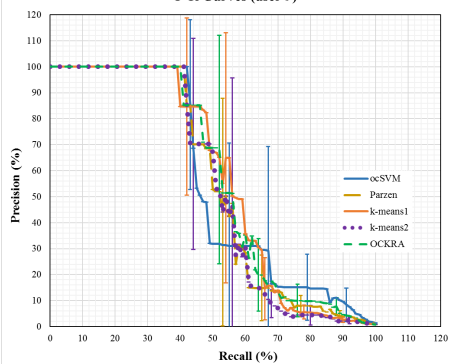

P-R Curves (user 10)

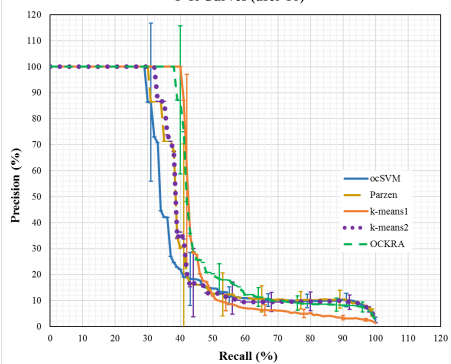

P-R Curves (user 11)

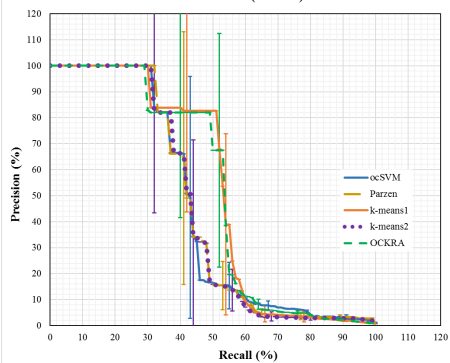

P-R Curves (user 12)

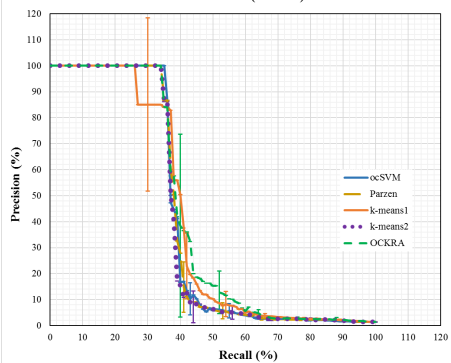

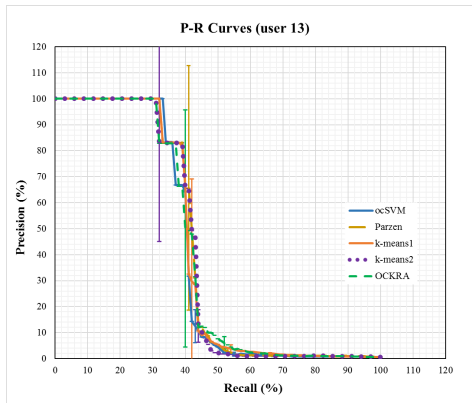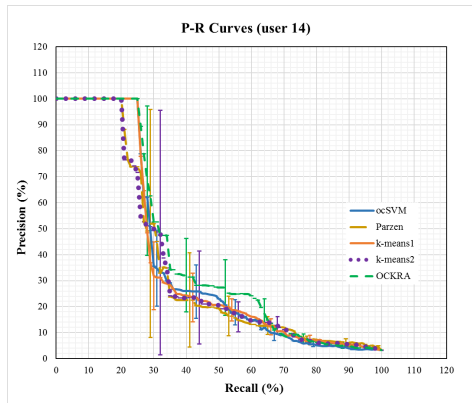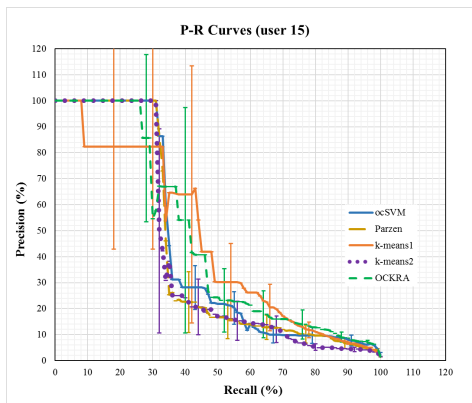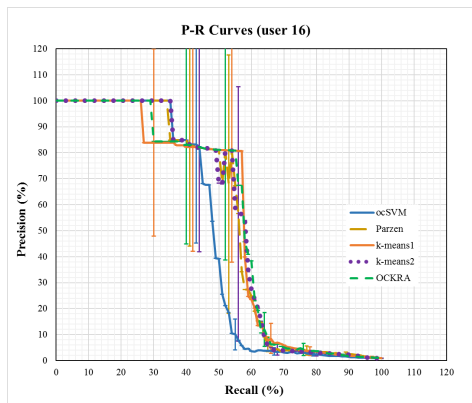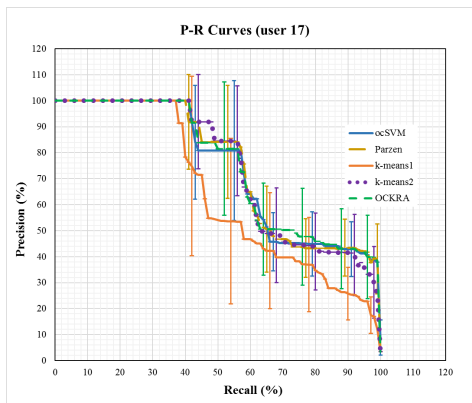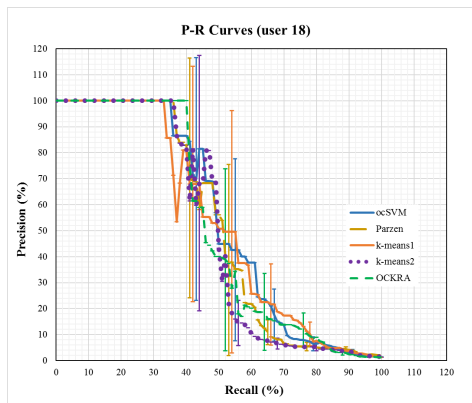

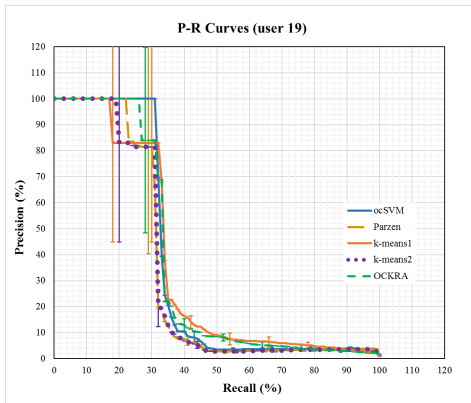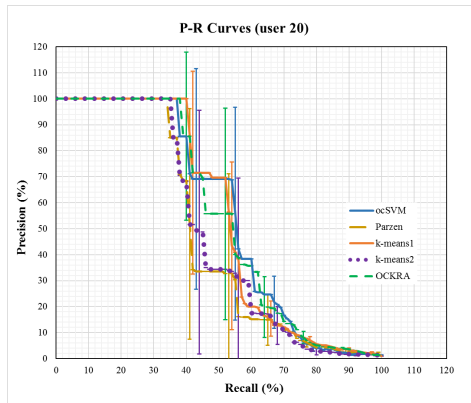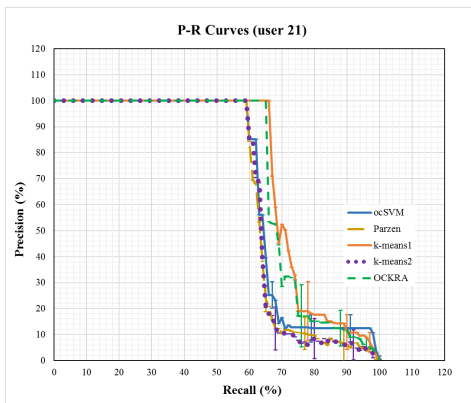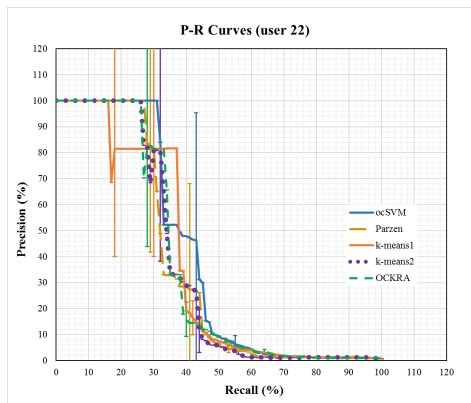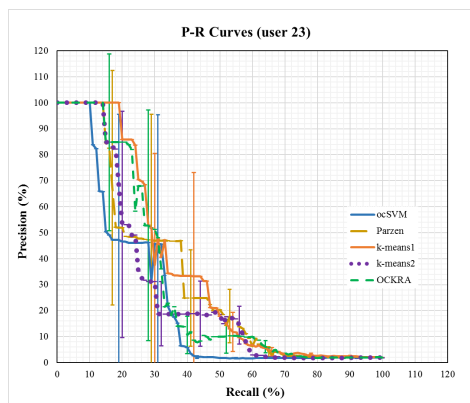

Supplement: s1 [file s1]
